# Supplementary material
Source: PubMed Central journal article supplement (PMC6475987)
Supplement: Appendix.pdf [file Appendix.pdf]

Table A: Summary of unit types and patient groups

| Study                      | Unit type/patient group | Included cardiac surgery? | Other notes                                                                                         |
|----------------------------|-------------------------|---------------------------|-----------------------------------------------------------------------------------------------------|
| Smith et al. 1995          | SICU                    | N                         |                                                                                                     |
| Wallace et al. 2002        | MICU in a Cancer centre | N                         |                                                                                                     |
| Enohumah et al. 2006       | Mixed                   | N                         |                                                                                                     |
| Yi et al. 2006             | NICU                    | N                         |                                                                                                     |
| Galhorta et al. 2007       | Mixed                   | N                         |                                                                                                     |
| Maia et al. 2008           | SICU                    | N                         |                                                                                                     |
| Roessler et al. 2009       | Mixed                   | N                         |                                                                                                     |
| Gershengorn et al. 2012    | Mixed*                  | Y                         |                                                                                                     |
| Schmittinger et al. 2012   | Mixed*                  | Y                         | Only reported surgical patients with cardiovascular failure treated with catecholamine vasopressors |
| Lee et al. 2013            | Mixed                   | N                         |                                                                                                     |
| Efendijev et al. 2014      | Mixed*                  | Y                         |                                                                                                     |
| Rozen et al. 2014          | Mixed*                  | Y                         |                                                                                                     |
| Haerkens et al.*** 2015    | Mixed*                  | Y                         |                                                                                                     |
| Flato et al. 2015          | NR                      | NR                        |                                                                                                     |
| Garcia Huertas et al. 2016 | Mixed                   | N                         |                                                                                                     |
| Chanthawong et al. 2016    | SICU                    | N                         |                                                                                                     |
| Perman et al. 2016         | Mixed*                  | Y                         |                                                                                                     |
| Miana et al. 2017          | Mixed*                  | Y                         |                                                                                                     |
| Cook and Thomas 2017       | Mixed                   | N                         |                                                                                                     |
| Quinn et al. 2017          | Mixed*                  | Y                         | Only included unplanned post-operative admissions                                                   |

SICU surgical ICU; MICU medical ICU; NICU neurosurgical ICU; NR not reported

Table B: Disease severity scores reported

| Study                   | Severity score reported |
|-------------------------|-------------------------|
| Enohumah et al. 2006    | SAPS II                 |
| Gershengorn et al. 2012 | MPMO-III                |
| Lee et al.              | APACHE II               |



|                            |                                |
|----------------------------|--------------------------------|
| 2013                       |                                |
| Efendijev et al.<br>2014   | SAPS II, APACHE II, SOFA, TISS |
| Rozen et al.<br>2014       | APACHE III                     |
| Chanthawong et al.<br>2016 | APACHE II, SOFA                |
| Cook and Thomas<br>2017    | ICNARC                         |

APACHE Acute Physiology, Age, Chronic Health Evaluation; SAPS Simplified Acute Physiology Score; ICNARC Intensive Care National Audit and Research Centre; SOFA Sequential Organ Failure Assessment; MPM Mortality Probability Model; TISS Therapeutic Intervention Scoring System.

Table C: Outcomes reported: survival beyond hospital discharge and neurological outcome

| Study                      | Survival* – other                                                                                                                                                                                                   | Neurological outcome*                                                                          |
|----------------------------|---------------------------------------------------------------------------------------------------------------------------------------------------------------------------------------------------------------------|------------------------------------------------------------------------------------------------|
| Wallace et al.<br>2002     | 2 (28.6%) transferred to other hospitals and survived >6months; 1 (14.3%) to a rehabilitation facility and survived >2 years; 4 (57.1%) were discharged home, of whom 2 survived >3 years, others lost to follow-up |                                                                                                |
| Enohumah et al.<br>2006    |                                                                                                                                                                                                                     | 82.5% CPC 1-2; 17.5% CPC 3-4                                                                   |
| Yi et al.<br>2006          | 14 (73.7%) survived beyond 12 months                                                                                                                                                                                | 21.1% irreversibly unconscious; 10.5% persistent neurological deficit; 68.4% complete recovery |
| Gershengorn et al.<br>2012 |                                                                                                                                                                                                                     | 20.1% of survivors functionally independent on discharge; 34.1% fully dependent                |
| Lee et al.<br>2013         | 32 (56.1%) of those surviving 24 hours still alive at 1 month; 27 (84.4%) of those were still alive at 3 months                                                                                                     | At 3 months: 29.6% CPC 1; 18.5% CPC 2; 33.3% CPC 3; 18.5% CPC 4                                |
| Chanthawong et al.<br>2016 | 17 (60.7%) of those surviving 24 hours still alive at 28 days                                                                                                                                                       | 40% CPC 1; 50% CPC 2; 0% CPC 3; 10% CPC 4                                                      |
| Miana et al.<br>2017       |                                                                                                                                                                                                                     | 83.3% CPS 1-2; 16.7% CPS 3 (one was paraplegic beforehand)                                     |

\*rates are of those discharged from hospital. CPC Cerebral Performance Category



## Survival outcomes

The pooled 24-hour survival ( $n = 7$ ) was 38.7% (95% CI 30.5-47.5  $I^2 = 83.0\%$ ; *Figure A*) and ICU survival ( $n = 6$ ) 26.2% (95% CI 11.3-49.8  $I^2 = 96\%$ ; *Figure B*). When the centre with the lowest reported hospital and ICU survival rates, a cancer centre, was excluded the rates of ICU and hospital discharge were 37.7% (95% CI 24.6-52.9%  $I^2 = 87.3\%$ ) and 20.9% (95% CI 11.8-34.4%  $I^2 = 99.3\%$ ) respectively.

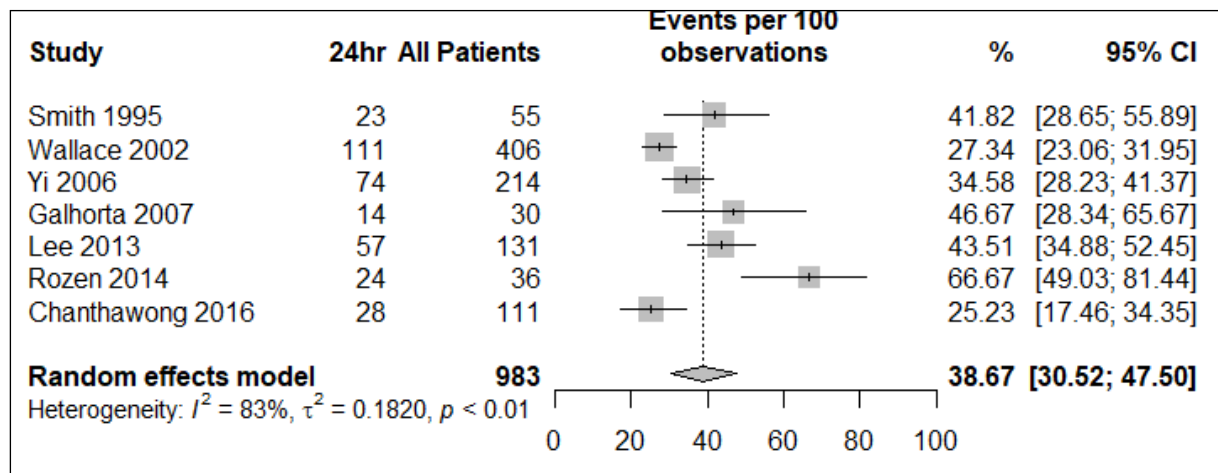

Figure A: 24-hour survival across all studies

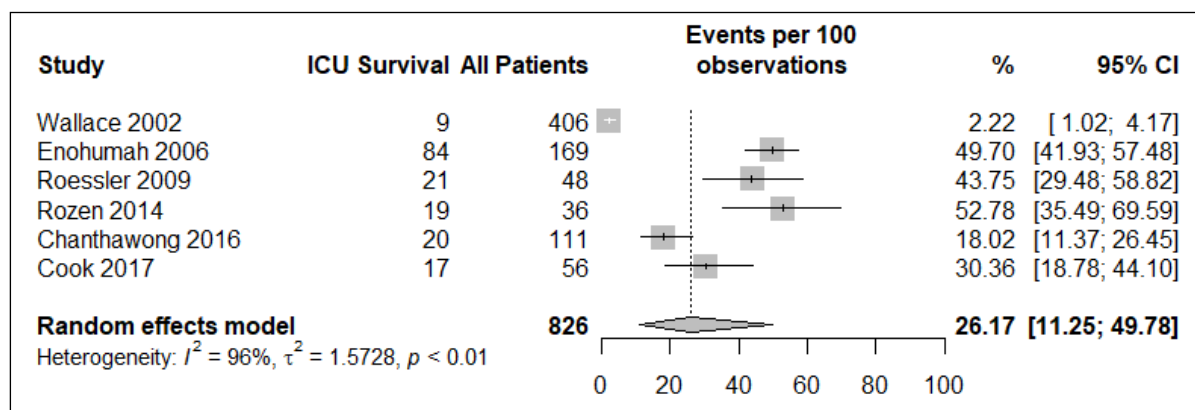

Figure B: ICU survival across all studies



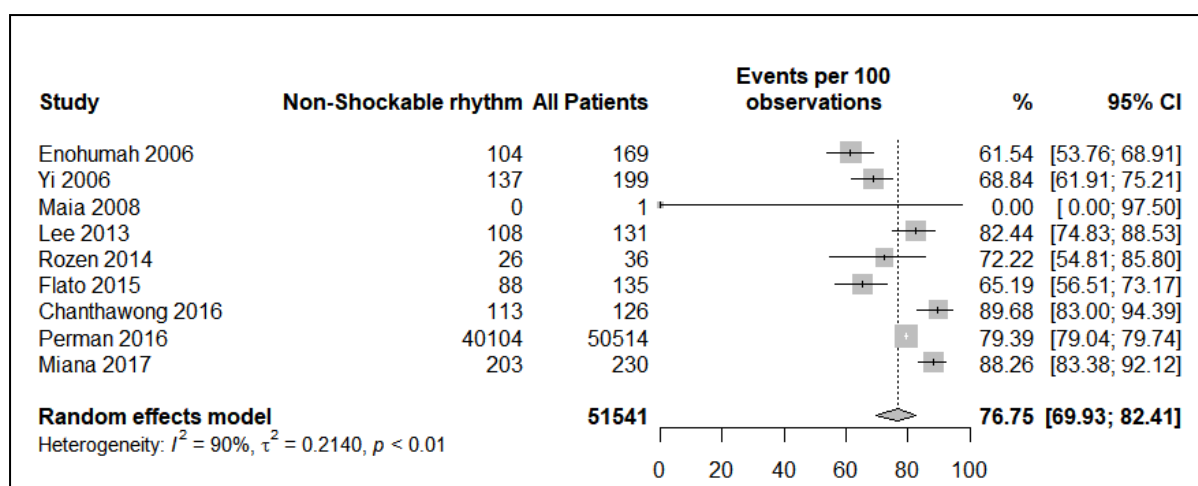

Figure C: Percentage non-shockable rhythm all studies

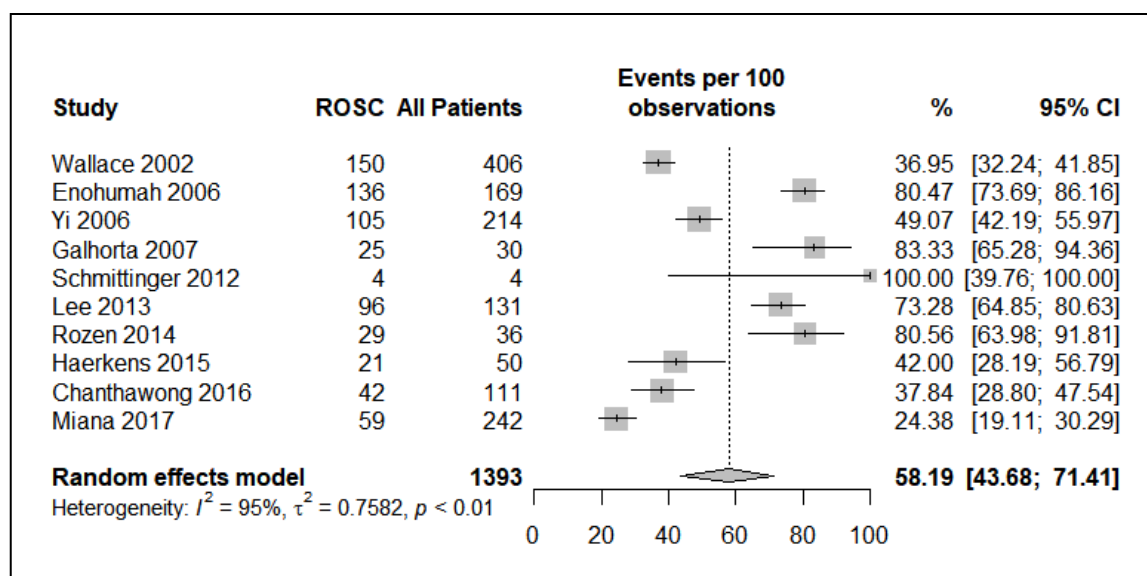

Figure D: Rates of return of spontaneous circulation (ROSC) in all studies

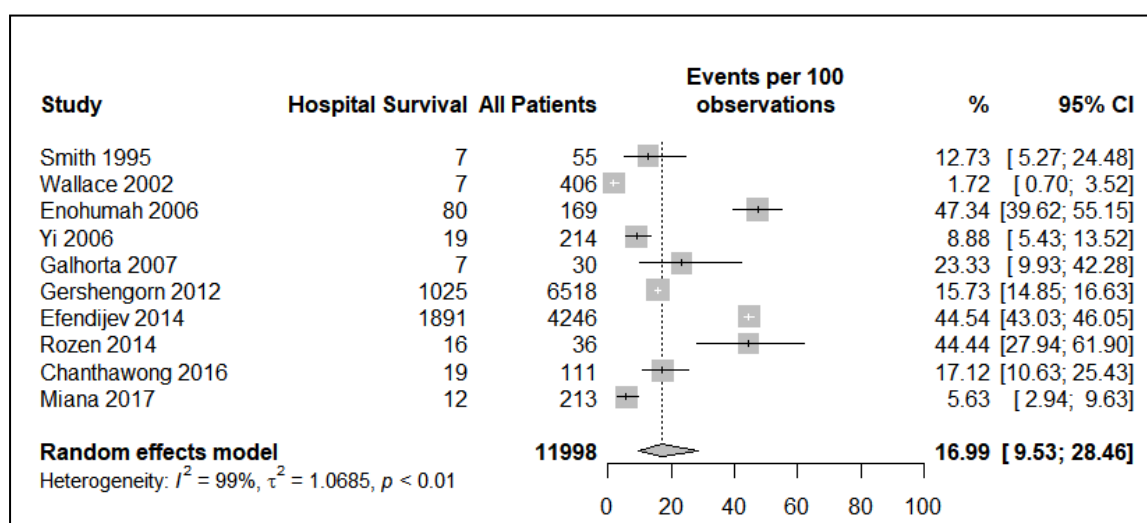

Figure E: Rates of hospital survival across all studies



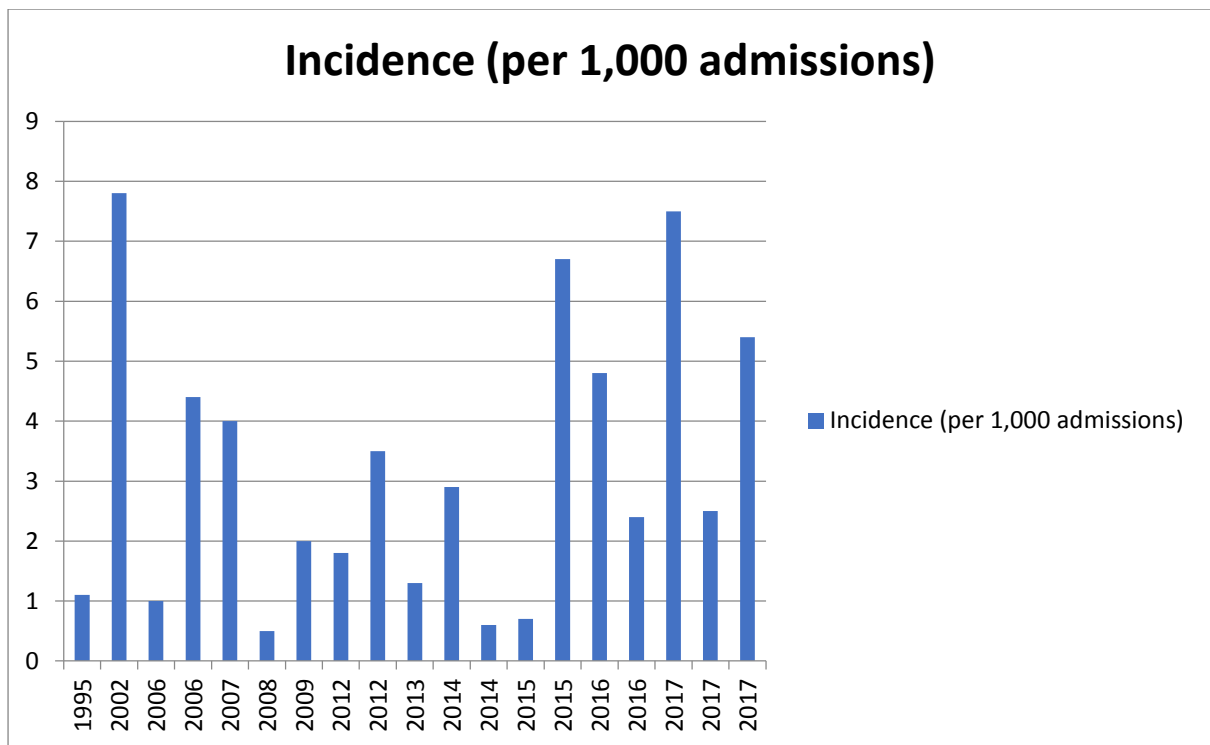

Figure F: Incidence of ICU-CA by year of reporting
